# Supplementary material for: Development and Optimization of a Multiplex Real-Time RT-PCR to Detect SARS-CoV-2 in Human Samples
Source: Int J Microbiol. 2024 Mar 11;2024:4894004. doi: 10.1155/2024/4894004 (PMC10948217; doi:10.1155/2024/4894004)
Supplement: Supplementary Materials — The supplementary file presents in-depth principles of PCR and quantitative PCR, reviewing the fundamentals of amplification, type of chemistries involved in fluorescence signals, and quantification strategies using real-time PCR. [file 4894004.f1.zip]

Archive with 4 entries (4 files):
- 19022024 RT-qPCR Supplementary File Word.docx
- Figure Suppl 1.pptx
- Figure Suppl 2.pptx
- Figure Suppl 3 Final.pptx
